# Supplementary material for: The NMDA receptor subunit GluN2D is a target for rapid antidepressant action
Source: Research Square preprint supplement (doi:10.21203/rs.3.rs-4807870/v1), 2024-10-07
Supplement: Supplementary file 1 [file 88754f0b762727b9a46e884a.xlsx]

## Sheet: Tabelle1
Figure 1
d	NMDAR current in PC	Baseline	100.0 %	F =8.656, R squared = 0.5529	8	Repeated measures one-way ANOVA with Geisser-Greenhouse correction of sphericity and post hoc t-tests using Dunnett correction, no outliers
		1 μM NAB-14	113.0 ± 28.1 %	p = 0.9399	8
		5 μM NAB-14	92.9 ± 16.0 %	p = 0.9954	8
		10 μM NAB-14	79.3 ± 9.6 %	p = 0.7700	8
		20 μM NAB-14	77.2 ± 15.4 %	p = 0.6479	8
		100 μM DAPV	0.0 %	p < 0.0001	8
	NMDAR current in IN	Baseline	100.0 %	F = 22.32 R squared = 0.7882	7	Repeated measures one-way ANOVA with Geisser-Greenhouse correction of sphericity and post hoc t-tests using Dunnett correction, no outliers
		1 μM NAB-14	99.3 ± 14.8 %	p > 0.9999	7
		5 μM NAB-14	72.8 ± 12.9 %	p = 0.2427	7
		10 μM NAB-14	40.14 ±8.4 %	p = 0.0014	7
		20 μM NAB-14	42.94 ± 8.9 %	p = 0.0026	7
		100 μM DAPV	0.0 %	p < 0.0001	7
e	NMDAR current in PC	PC: Baseline	100.0 %	F = 35.35, R squared = 0.8347	8	Repeated measures one-way ANOVA with Geisser-Greenhouse correction of sphericity and post hoc t-tests using Dunnett correction, no outliers
		1 μM KET	92.6 ± 8.8 %	p = 0.8620	8
		5 μM KET	59.0 ± 5.6 %	p = 0.0060	8
		10 μM KET	52.0 ± 8.7 %	p = 0.0035	8
		20 μM KET	35.4 ± 7.4 %	p = 0.0002	8
		100 μM DAPV	0.0 %	p < 0.0001	8
	NMDAR current in IN	Baseline	100.0 %	F = 73.32, R squared = 0.9244	7	Repeated measures one-way ANOVA with Geisser-Greenhouse correction of sphericity and post hoc t-tests using Dunnett correction, no outliers
		1 μM KET	55.6 ± 7.5 %	p = 0.0037	7
		5 μM KET	31.8 ± 6.0 %	p = 0.0001	7
		10 μM KET	17.6 ± 2.8 %	p < 0.0001	7
		20 μM KET	14.7 ± 4.9 %	p < 0.0001	7
		100 μM DAPV	0.0 %	p < 0.0001	7
Figure S1
a (middle)	control	~ 0 - 480 sek	146.3 ± 41.6 pA		6
	CNQX	~ 800 - 1280 sek	67.4 ± 10.8 pA		6
	DAPV	~ 1600 - 2040 sek	12.6 ± 3.9 pA		6
a (right)	control	expressed as % of baseline	100.0 %	F = 141.8, R squared = 0.9659	6	Repeated measures one-way ANOVA with Geisser-Greenhouse correction of sphericity and post hoc t-tests using Dunnett correction, no outliers
	CNQX		49.3 ± 6.9 %	p = 0.0013	6
	DAPV		9.3 ± 3.7 %	p < 0.0001	6
b (middle)	control	~ 0 - 480 sek	65.6 ± 11.4 pA		6
	CNQX	~ 800 - 1280 sek	11.8 ± 1.5 pA		6
	DAPV	~ 1600 - 2040 sek	7.7 ± 2.0 pA		6
b (right)	control	expressed as % of baseline	100.0 %	F = 1308, R squared = 0.9962	6	Repeated measures one-way ANOVA with Geisser-Greenhouse correction of sphericity and post hoc t-tests using Dunnett correction, no outliers
	CNQX		19.4 ± 1.9 %	p < 0.0001	6
	DAPV		12.2 ± 2.2 %	p < 0.0001	6
c (middle/ right)	CNQX	~ 0 - 100 sek	93.7 ± 12.6 pA	F = 20.06, R squared = 0.7698	7	Repeated measures one-way ANOVA with Geisser-Greenhouse correction of sphericity and post hoc t-tests using Dunnett correction, no outliers
	CNQX	~ 360 - 450 sek	106.7 ± 13.1 pA	p = 0.6026	7
	CNQX	~ 715 - 795 sek	92.0 ± 14.5 pA	p = 0.9997	7
	CNQX	~ 1060 - 1150 sek	86.6 ± 12.9 pA	p = 0.9197	7
	DAPV	~ 1415 - 1495 sek	17.3 ± 1.6 pA	p < 0.0001	7
e (left)	CNQX	~ 0 - 100 sek	113.8 ± 26.5 pA	F = 6.604, R squared = 0.4854	8	Repeated measures one-way ANOVA with Geisser-Greenhouse correction of sphericity and post hoc t-tests using Dunnett correction, no outliers
	1 μM NAB 14	~ 360 - 450 sek	108.8 ± 21.4 pA	p = 0.9991	8
	5 μM NAB-14	~ 715 - 795 sek	95.1 ± 12.8 pA	p = 0.8239	8
	20 μM NAB-14	~ 1060 - 1150 sek	80.0 ± 8.5 pA	p = 0.4711	8
	DAPV	~ 1415 - 1495 sek	26.7 ± 5.3 pA	p = 0.0172	8
e (right)	CNQX	~ 0 - 100 sek	124.8 ± 13.8 pA	F = 17.99, R squared = 0.7499	7	Repeated measures one-way ANOVA with Geisser-Greenhouse correction of sphericity and post hoc t-tests using Dunnett correction, no outliers
	1 μM NAB 14	~ 360 - 450 sek	124.3 ± 19.1 pA	p > 0.9999	7
	5 μM NAB-14	~ 715 - 795 sek	102.2 ± 18.8 pA	p = 0.5915	7
	20 μM NAB-14	~ 1060 - 1150 sek	75.7 ± 15.8 pA	p = 0.0017	7
	DAPV	~ 1415 - 1495 sek	31.1 ± 7.5 pA	p = 0.0003	7
g (left)	CNQX	~ 0 - 100 sek	147.0 ± 29.0 pA	F = 21.12, R squared = 0.7510	8	Repeated measures one-way ANOVA with Geisser-Greenhouse correction of sphericity and post hoc t-tests using Dunnett correction, no outliers
	1 μM KET	~ 360 - 450 sek	132.0 ± 21.8 pA	p = 0.8968	8
	5 μM KET	~ 715 - 795 sek	96.0 ± 17.0 pA	p = 0.0346	8
	20 μM KET	~ 1060 - 1150 sek	68.7 ± 13.3 pA	p = 0.0231	8
	DAPV	~ 1415 - 1495 sek	29.8 ± 6.6 pA	p = 0.0094	8
g (right)	CNQX	~ 0 - 100 sek	137.1 ± 18.0 pA	F = 23.69, R squared = 0.7979	7	Repeated measures one-way ANOVA with Geisser-Greenhouse correction of sphericity and post hoc t-tests using Dunnett correction, no outliers
	1 μM KET	~ 360 - 450 sek	79.4 ± 6.0 pA	p = 0.0643	7
	5 μM KET	~ 715 - 795 sek	53.6 ± 7.4 pA	p = 0.0225	7
	20 μM KET	~ 1060 - 1150 sek	36.1 ± 4.9 pA	p = 0.0071	7
	DAPV	~ 1415 - 1495 sek	21.5 ± 3.3 pA	p = 0.0024	7
Figure 2
b (left)	control	Baseline	4.0 ± 0.6 mV		8	Two-tailed paired t-test, normal distribution, no outliers
		mean EPSP 20 min to 30 min	3.5 ± 0.4 mV	Baseline vs. EPSP 20 to 25 min control: p = 0.0778	8
	10 μM-NAB-14	Baseline	3.4 ± 0.4 mV		9	Two-tailed paired t-test, normal distribution, no outliers
		mean EPSP 20 min to 30 min	4.3 ± 0.7 mV	Baseline vs. EPSP 20 to 25 min 10 μM NAB-14: p = 0.3008	9
	20 μM-NAB-14	Baseline	3.9 ± 0.3 mV		10	Two-tailed paired t-test, normal distribution, no outliers
		mean EPSP 20 min to 30 min	7.7 ± 1.8 mV	Baseline vs. EPSP 20 to 25 min 20 μM NAB-14: p = 0.0080	10
b (right)	control	expressed as % of baseline	89.9 ± 4.2 %	F = 5.214, R squared = 0.3119	8	One-way ANOVA with post hoc t-tests using Dunnett correction, no outliers
	10 μM-NAB-14		137.2 ± 27.7 %	p = 0.3132	9
	20 μM-NAB-14		200.5 ± 28.1 %	p = 0.0074	10
c (left)	control	Baseline	4.1 ± 0.6 mV		8	Two-tailed paired t-test, normal distribution, no outliers
		mean EPSP 20 min to 30 min	3.5 ± 0.4 mV	Baseline vs. EPSP 20 to 25 min control: p = 0.0778	8
	10 μM-KET	Baseline	4.8 ± 0.2 mV		17	Two-tailed paired t-test, normal distribution, no outliers
		mean EPSP 20 min to 30 min	4.7 ± 0.7 mV	Baseline vs. EPSP 20 to 25 minwash-in 10 KET: p = 0.4038	17
	100 μM-KET	Baseline	4.7 ± 0.4 mV		8	Two-tailed paired t-test, normal distribution, no outliers
		mean EPSP 20 min to 30 min	5.2 ± 0.9 mV	Baseline vs. EPSP 20 to 25 min wash-in 100 KET: p = 0.8077	8
c (right)	control	expressed as % of baseline	89.9 ± 4.2 %	F = 0.4527, R squared = 0.03635	8	One-way ANOVA with post hoc t-tests using Dunnett correction, no outliers
	10 μM-KET		94.3 ± 11.1 %	p = 0.9369	17
	100 μM-KET		116.1 ± 20.0 %	p = 0.7701	8
d (middle)	control	Baseline	100 ± 2.4 %		6	Two-tailed paired t-test, normal distribution, no outliers
		mean EPSP 20 min to 30 min	110.0 ± 4.9 %	Baseline vs. EPSP 20 to 30 min control: p = 0.3773	6
	10 μM NAB-14	Baseline	100 ± 2.1 %		10	Two-tailed paired t-test, normal distribution, no outliers
		mean EPSP 20 min to 30 min	224.6 ± 17.9 %	Baseline vs. EPSP 20 to 30 min 10 μM NAB-14: p = 0.0036	10
d (right)	MICA- decay tau - control	Baseline	35.4 ± 5.6 mS		5	Two-tailed paired t-test, normal distribution, no outliers
		Decay Tau	22.9 ± 6.1 mS	Baseline vs. Decay Tau 20 to 30 min control: p = 0.0363	5
		expressed as % of baseline	64.3 ± 10.5 %		5
	MICA - decay tau -10 μM-NAB-14	Baseline	56.1 ± 6.4 mS		8	Two-tailed paired t-test, normal distribution, no outliers
		Decay Tau	50.2 ± 9.7 mS	Baseline vs. Decay Tau 20 to 30 min 10 μM NAB-14: p = 0.5253	8
		expressed as % of baseline	96.5 ± 11.2 %		8
	Group comparision	normalized control vs. normalized NAB-14		p = 0.0451		Two-tailed unpaired t-test, normal distribution, no outliers
e (middle)	control	Baseline (% of Baseline)	100 ± 1.4 %		9	Two-tailed paired t-test, normal distribution, no outliers
		mean EPSP 20 min to 30 min (% of Baseline)	106.3 ± 6.0 %	Baseline vs. EPSP 20 to 30 min control: p = 0.3773	9
	10 μM-KET	Baseline	100 ± 2.2 %		12	Two-tailed paired t-test, normal distribution, no outliers
		mean EPSP 20 min to 30 min	214.5 ± 41.9 %	Baseline vs. EPSP 20 to 30 min 10 μM KET: p = 0.0015	12
e (right)	MICA- decay tau - control	Baseline	52.6 ± 3.6 ms		9	Two-tailed paired t-test, normal distribution, no outliers
		Decay Tau	48.8 ± 3.4 ms	Baseline vs. Decay Tau 20 to 30 min control: p = 0.0264	9
		expressed as % of baseline	81.2 ± 7.2 %		9
	MICA - decay tau - 10 μM KET	Baseline	38.0 ± 11.5 ms		12	Two-tailed paired t-test, normal distribution, no outliers
		Decay Tau	50.0 ± 6.2 ms	Baseline vs. Decay Tau 20 to 30 min 10 μM KET: p = 0.0181	12
		expressed as % of baseline	131.1 ± 9.3 %		12
	Group comparision	normalized control vs. normalized KET		p = 0.0028		Two-tailed unpaired t-test, normal distribution, no outliers
Figure S2
a	control	Baseline	3.2 ± 0.3 mV		6
		mean EPSP 20 min to 30 min	3.5 ± 0.1 mV	Baseline vs. EPSP 20 to 30 min control: p = 0.3773	6	Two-tailed paired t-test, normal distribution, no outliers
b	10 μM NAB-14	Baseline	4.5 ± 1.0 mV		10
		mean EPSP 20 min to 30 min	8.5 ± 1.2 mV	Baseline vs. EPSP 20 to 30 min 10 μM NAB-14: p = 0.0036	10	Two-tailed paired t-test, normal distribution, no outliers
c	10 μM-KET	Baseline	6.7 ± 1.0 mV		13
		mean EPSP 20 min to 30 min	11.6 ± 1.7 mV	Baseline vs. EPSP 20 to 30 min 10 μM KET: p = 0.0015	13	Two-tailed paired t-test, normal distribution, no outliers
d	10 μM-NAB-14	CV^-2 post/CV^-2 pre	1.25 ± 0.35		8
			1.00 ± 0.00	CV^-2 post/CV^-2 pre vs. CV^-2 pre/CV^-2 pre : p = 0.4992	8	Two-tailed paired t-test, normal distribution, no outliers
e	Input resistance - 10 μM-NAB-14	input resistance pre	147 ± 11 MΩ	F = 4.183, R squared = 0.3741	8	Repeated measures one-way ANOVA with Geisser-Greenhouse correction of sphericity and post hoc t-tests using Dunnett correction, no outliers
		input resistance post1	151 ± 15 MΩ	pre vs. post1 : p = 0.0788	8
		input resistance post2	179 ± 23 MΩ	pre vs. post2 : p = 0.1326	8
f	Input resistance - 10 μM KET	input resistance pre	182 ± 18 MΩ	F = 1.419 , R squared 0.06329	15	Repeated measures one-way ANOVA with Geisser-Greenhouse correction of sphericity and post hoc t-tests using Dunnett correction, no outliers
		input resistance post1	245 ± 31 MΩ	pre vs. post1 : p = 0.3080	15
		input resistance post2	254 ± 44 MΩ	pre vs. post2 : p = 0.2220	15
g	Baseline	number of action potentials	8.23 ± 0.51	action potentials control vs. action potentials KET : p = 0.1125	12	Two-tailed paired t-test, normal distribution, no outliers
	10 μM KET		7.81 ± 0.72		12
h	Baseline	number of action potentials	5.97 ± 0.39	action potentials control vs. action potentials NAB-14 : p = 0.4633	9	Two-tailed paired t-test, normal distribution, no outliers
	10 μM NAB-14		6.99 ± 0.46		9
i	Baseline	number of action potentials/10 min.	0.5 ± 0.3	action potentials control vs. action potentials KET : p = 0.0313	8	Two-tailed paired t-test, normal distribution, no outliers
	10 μM KET		4.2 ± 1.5		8
j	Baseline	number of action potentials/10 min.	1.2 ± 1.0	action potentials control vs. action potentials NAB-14 : p = 0.078	6	Two-tailed paired t-test, normal distribution, no outliers
	10 μM NAB-14		6.6 ± 1.8		6
Figure 3
a	weak-aLTP-control	Mean EPSPs normalized to baseline	115.6 ± 6.7 %	F = 2.419, R squared = 0.1245	25	One-way ANOVA with post hoc t-tests using Dunnett correction, no outliers
	weak-LTP 1 μM-NAB-14		117.4 ± 16.6 %	weak-aLTP-control vs. weak-LTP 1 μM-NAB-14: p = 0.8748	8
	weak-LTP 5 μM-NAB-14		130.2 ± 20.7 %	weak-aLTP-control vs. weak-LTP 5 μM-NAB-14: p = 0.2295	11
	weak-LTP 10 μM-NAB-14		142.3 ± 8.5 %	weak-aLTP-control vs. weak-LTP 10 μM-NAB-14: p = 0.0471	11
b	EC-50 NAB-14 - PC	N/A - no significant effect on NMDAR currents	N/A
	EC-50 NAB-14 - IN	Calculated EC-50 of NMDAR currents in IN	5.031 μM	Goodness of fit: R-squared: 0.9618, Sum of squared: 290.2, Sy.x: 12.05
c	weak-aLTP-control	Mean EPSPs normalized to baseline	115.6 ± 6.7 %	F = 2.308, R squared = 0.0856	25	one-way ANOVA with post hoc t-tests using Dunnett correction
	weak-LTP 1 μM-KET		128.1 ± 12.5 %	weak-aLTP-control vs. weak-LTP 1 μM-KET: p = 0.5194	12
	weak-LTP 5 μM-KET		134.2 ± 7.3 %	weak-aLTP-control vs. weak-LTP 5 μM-KET: p = 0.0347	19
	weak-LTP 10 μM-KET		106.3 ± 9.8 %	weak-aLTP-control vs. weak-LTP 10 μM-KET: p = 0.7678	10
d	EC-50 KET - PC	Calculated EC-50 of NMDAR currents in PC	4.778 μM	Goodness of fit: R-squared: 0.9880, Sum of squared: 36.28, Sy.x: 6.023
	EC-50 KET - IN	Calculated EC-50 of NMDAR currents in IN	1.545 μM	Goodness of fit: R-squared: 0.9972, Sum of squared: 14.18, Sy.x: 3.765
g	weak-LTP-SOM-Gq-DREADD	Baseline	5.5 ± 0.9 mV		6
		Post weak-aLTP (mean EPSP 20 min to 30 min) control	3.7 ± 0.8 mV	Baseline vs. Post weak-LTP: p = 0.0925	6	Two-tailed paired t-test, normal distribution, no outliers
		expressed as % of baseline	74.3 ± 17.4 %		6
	weak-LTP-SOM-Gi-DREADD	Baseline	4.7 ± 0.74 mV		12
		Post weak-aLTP (mean EPSP 20 min to 30 min) control	5.8 ± 0.9 mV	Baseline vs. Post weak-LTP: p = 0.0186	12	Two-tailed paired t-test, normal distribution, no outliers
		expressed as % of baseline	124.3 ± 7.2 %		12
	Group comparision			Gi DREADD weak-LTP vs. Gq DREADD weak-LTP: p = 0.0060		Two-tailed unpaired t-test, normal distribution, no outliers
Figure S3
c	weak-aLTP	in % of baseline	117.1 ± 7.1 %	Baseline vs. PostaLTP: p = 0.0247	25	Two-tailed paired t-test, normal distribution, no outliers
	aLTP	in % of baseline	153.2 ± 4.1 %	Baseline vs. PostaLTP: p < 0.0001	70	Two-tailed paired t-test, normal distribution, no outliers
	group comparision			weak-LTP vs. aLTP: p < 0.0001		Two-tailed unpaired t-test, normal distribution, no outliers
d	control	Baseline (mean EPSP -5 min to 0 min) control	3.1 ± 0.3 mV		10
		Post aLTP (mean EPSP 25 min to 30 min) control	4.8 ± 0.6 mV	Baseline vs. post aLTP control: p = 0.0077	10	Two-tailed paired t-test, normal distribution, no outliers
	10 μM-KET	Baseline (mean EPSP -5 min to 0 min) KET	3.5 ± 0.2 mV		10
		Post aLTP (mean EPSP 25 min to 30 min) KET	4.7 ± 0.4 mV	Baseline vs. post aLTP KET: p = 0.0113	10	Two-tailed paired t-test, normal distribution, no outliers
	control	Post aLTP expressed in % of baseline	146.7 ± 12.8 %	group comparision: p = 0.7119	10
	10 μM-KET	Post aLTP expressed in % of baseline	140.1 ± 11.9 %		10	Two-tailed unpaired t-test, normal distribution, no outliers
e	control + PIC	Baseline (mean EPSP -5 min to 0 min) control	3.5 ± 0.2 mV		10
		Post aLTP (mean EPSP 25 min to 30 min) control	6.1 ± 0.9 mV	Baseline vs. post aLTP control : p = 0.0079	10	Two-tailed paired t-test, normal distribution, no outliers
	10 μM-KET + PIC	Baseline (mean EPSP -5 min to 0 min) KET	3.7 ± 0.3 mV		8
		Post aLTP (mean EPSP 25 min to 30 min) KET	3.8 ± 0.2 mV	Baseline vs. post aLTP KET: p = 0.7963	8	Two-tailed paired t-test, normal distribution, no outliers
	control + PIC	Post aLTP expressed in % of baseline	189.0 ± 12.6 %	group comparision: p > 0.0001	10
	10 μM-KET + PIC	Post aLTP expressed in % of baseline	104.9 ± 10.2 %		8	Two-tailed unpaired t-test, normal distribution, no outliers
f	PPR-weak-LTP-control	weak-aLTP PPR pre	1.26 ± 0.12		9
		weak-aLTP PPR post	1.37 ± 0.09	weak-aLTP PPR pre vs. weak-aLTP PPR post: p = 0.4911	9	Two-tailed paired t-test, normal distribution, no outliers
	PPR-weak-LTP 10 μM-NAB-14	10 μM NAB weak-aLTP PPR pre	1.34 ± 0.15		10
		10 μM NAB weak-aLTP PPR post	1.36 ± 0.13	10 μM NAB weak-aLTP PPR pre vs. 10 μM NAB weak-aLTP PPR post: p = 0.9095	10	Two-tailed paired t-test, normal distribution, no outliers
g	PPR-weak-LTP 5 μM-KET	5 μM KET weak-aLTP PPR pre	1.74 ± 0.14		9
		5 μM KET weak-aLTP PPR post	1.84 ± 0.11	5 μM KET weak-aLTP PPR pre vs. 5 μM KET weak-aLTP PPR post: p = 0.1289	9	Two-tailed paired t-test, normal distribution, no outliers
	PPR-weak-LTP 10 μM-KET	10 μM KET weak-aLTP PPR pre	1.69 ± 0.11		10
		10 μM KET weak-aLTP PPR post	1.63 ± 0.08	10 μM KET weak-aLTP PPR pre vs. 10 μM KET weak-aLTP PPR post: p = 0.5566	10	Two-tailed paired t-test, normal distribution, no outliers
Figure 4
b	LTP + CDM + vector	Baseline (mean EPSP -5 min to 0 min) CDM + vector	4.3 ± 0.3 mV		12
		Post aLTP (mean EPSP 25 min to 30 min) CDM + vector	4.3 ± 0.6 mV	Baseline CDM + vector vs. post aLTP CDM + vector: p = 0.9699	12	Two-tailed paired t-test, normal distribution, no outliers
	LTP + CDM + NAB	Baseline (mean EPSP -5 min to 0 min) CDM + NAB-14	3.7 ± 0.2 mV		16
		Post aLTP (mean EPSP 25 min to 30 min) CDM + NAB-14	7.4 ± 0.6 mV	Baseline CDM + NAB-14 vs. post aLTP CDM + NAB-14: p <0.0001	16	Two-tailed paired t-test, normal distribution, no outliers
	Vector	Post aLTP expressed in % of baseline	208.7 ± 20.0 %	group comparision: p = 0.0005	12
	NAB-14	Post aLTP expressed in % of baseline	101.6 ± 10.6 %		16	Two-tailed unpaired t-test, normal distribution, no outliers
c	LTP + CDM + saline	Baseline (mean EPSP -5 min to 0 min) CDM + saline	3.2 ± 0.2 mV		7
		Post aLTP (mean EPSP 25 min to 30 min) CDM + saline	3.2 ± 0.3 mV	Baseline CDM vs post aLTP CDM + saline: p = 0.999	7	Two-tailed paired t-test, normal distribution, no outliers
	LTP + CDM + KET	Baseline (mean EPSP -5 min to 0 min) CDM + KET	3.1 ± 0.3 mV		6
		Post aLTP (mean EPSP 25 min to 30 min) CDM + KET	6.2 ± 0.8 mV	Baseline CDM + KET vs. post aLTP CDM + KET: p = 0.0045	6	Two-tailed paired t-test, normal distribution, no outliers
	Vector	Post aLTP expressed in % of baseline	198.4 ± 20.2 %	group comparision: p = 0.0009	7
	KET	Post aLTP expressed in % of baseline	102.7 ± 9.4 %		6	Two-tailed unpaired t-test, normal distribution, no outliers
d	LTP + CDM + sc. siRNA	Baseline (mean EPSP -5 min to 0 min) CDM + sc. siRNA	3.7 ± 0.2 mV		20
		Post aLTP (mean EPSP 25 min to 30 min) CDM + sc. siRNA	4.1 ± 0.3 mV	Baseline CDM vs. post aLTP CDM + sc. siRNA: p = 0.2305	20	Two-tailed paired t-test, normal distribution, no outliers
	LTP + CDM + Grin 2D siRNA	Baseline (mean EPSP -5 min to 0 min) CDM + Grin 2D siRNA	3.9 ± 0.3 mV		16
		Post aLTP (mean EPSP 25 min to 30 min) CDM + Grin 2D siRAN	5.9 ± 0.5 mV	Baseline CDM vs. post aLTP CDM + siRNA: p = 0.010	16	Two-tailed paired t-test, normal distribution, no outliers
	sc. siRNA	Post aLTP expressed in % of baseline	110.0 ± 8.0 %	group comparision: p = 0.0146	19
	Grin2D siRNA	Post aLTP expressed in % of baseline	148.1 ± 11.9 %		21	Two-tailed unpaired t-test, normal distribution, no outliers
Figure S4
	CDM + vector	Baseline (mean EPSP -5 min to 0 min) CDM + vector	4.3 ± 0.3 mV	Baseline CDM + vector vs. post aLTP CDM + vector: p = 0.9699	12
		Post aLTP (mean EPSP 25 min to 30 min) CDM + vector	4.3 ± 0.6 mV		12	Two-tailed paired t-test, normal distribution, no outliers
	CDM + NAB-14	Baseline (mean EPSP -5 min to 0 min) CDM + 5 NAB-14	3.7 ± 0.2 mV	Baseline CDM vs post aLTP CDM +5 NAB-14: p = 0.0361	19
		Post aLTP (mean EPSP 25 min to 30 min) CDM + 5 NAB-14	4.9 ± 0.7 mV		19	Two-tailed paired t-test, normal distribution, no outliers
	CDM + vector	Post aLTP expressed in % of baseline	101.6 ± 10.6 %	group comparision: p = 0.0443	12
	CDM + NAB-14	Post aLTP expressed in % of baseline	127.9 ± 7.2 %		19	Two-tailed unpaired t-test, normal distribution, no outliers
Figure 5
b	naive	number of vGlu 1 spots /mm³	0.4853 ± 0.0818	F = 2.992, R squared = 0.2190	5	One-way ANOVA with post-hoc t-tests, Dunnett correction
	CDM		0.2881 ± 0.0531	naive vs. CDM: p = 0.1171	5
	NAB-14		0.4836 ± 0.0204	CDM vs. NAB-14: p = 0.0403	5
	KET		0.3248 ± 0.0770	CDM vs. KET: p = 0.8770	5
c	naive	number of GAD 65 spots /mm³	0.0464 ± 0.0028	F = 8.016, R squared = 0.6005	5	One-way ANOVA with post-hoc t-tests, Dunnett correction
	CDM		0.0394 ± 0.0017	CDM vs. naive: p = 0.0813	4
	NAB-14		0.0534 ± 0.0018	CDM vs NAB-14: p = 0.0006	6
	KET		0.0453 ± 0.0014	CDM vs. KET: p = 0.1583	5
d	excitation - naive	naive/naive	1
	excitation - CDM	CDM/naive	0.593653410261694
	excitation + KET	+KET/naive	0.669276736039563
	excitation + NAB-14	+NAB-14/naive	0.996497012157428
	inhibition - naive	naive/naive	1
	inhibition - CDM	CDM/naive	0.849137931034483
	inhibition + KET	+KET/naive	0.976293103448276
	inhibition + NAB-14	+NAB-14/naive	1.15086206896552
e	naive	PSD 95/GAPDH (% of CDM)	115.3 ± 18.7 %	p = 0.08718, R squared = 0.08718	8	one sample t-test comparing the mean with 100, no outliers
	CDM		100.0 %		8
	NAB-14		146.0 ± 19.3 %	p = 0.0482, R squared = 0.4493	8	one sample t-test comparing the mean with 100, no outliers
	KET		164.2 ± 21.9 %	p = 0.0220, R squared = 0.5509	8	one sample t-test comparing the mean with 100, no outliers
f	naive	GluR1A/GAPDH (% of CDM)	152.9 ± 23.6 %	p = 0.058, R squared = 0.4226	8	one sample t-test comparing the mean with 100, no outliers
	CDM		100.0 %		8
	NAB-14		132.0 ± 12.6 %	p = 0.0389, R squared = 0.4787	8	one sample t-test comparing the mean with 100, no outliers
	KET		144.4 ± 10.1 %	p = 0.0031, R squared = 0.7360	8	one sample t-test comparing the mean with 100, no outliers
Figure S5
b	GluN2D-RNA HIP vector	HIP vector	100 ± 38 %	HIP vector vs. HIP siRNA: p= 0.0159	5
	GluN2D-RNA HIP siRNA	HIP siRNA	13 ± 2 %		5	Two-tailed unpaired t-test, normal distribution, no outliers
	GluN2D-RNA HIP vector	FC vector	100 ± 58 %	FC vector vs. FC siRNA: p= 0.0286	5
	GluN2D-RNA HIP siRNA	FC siRNA	3 ± 0,5 %		5	Two-tailed unpaired t-test, normal distribution, no outliers
	GluN2D Protein - HIP vector	GluN2D/Tubulin	0.086 ± 0.009	vector vs. siRNA: p = 0.028	4
	GluN2D Protein - HIP siRNA	GluN2D/Tubulin	0.024 ± 0.023		4	Two-tailed unpaired t-test, normal distribution, no outliers
Figure 6
a	Day 5	Immobility time	346 ± 37 s		9
	CDM + saline	Immobility time CDM + saline	322± 32 s	Day 5 vs. CDM: p = 0.5902	9	Two-tailed paired t-test, normal distribution, no outliers
	Day 5	Immobility time	333 ± 25 s		10
	CDM + 5 mg/kg NAB-14	Immobility time CDM + 5 NAB-14	262 ± 30 s	Day 5 vs. 5 NAB-14: p = 0.0376	10	Two-tailed paired t-test, normal distribution, no outliers
	Day 5	Immobility time	382 ± 21 s		10
	CDM + 10 mg/kg NAB-14	Immobility time CDM + 10 NAB-14	292 ± 23 s	Day 5 vs. 10 NAB-14: p = 0.0099	10	Two-tailed paired t-test, normal distribution, no outliers
	Day 5	Immobility time	317 ± 36 s		10
	CDM + NAB-14 + CIQ	Immobility time CDM + NAB-14 + CIQ	308 ± 30 s	Day 5 vs. 10 NAB-14 + CIQ: p = 0.1655	10	Two-tailed paired t-test, normal distribution, no outliers
	Day 5	Immobility time	397 ± 21 s		7
	CDM + KET	Immobility time CDM+ KET	217 ± 49 s	Day 5 vs KET: p = 0.0418	7	Two-tailed paired t-test, normal distribution, no outliers
	Day 5	Immobility time	381 ± 16 s		8
	CDM + siRNA	Immobility time CDM + siRNA	318 ± 28 s	Day 5 vs. siRNA: p = 0.0391	8	Two-tailed paired t-test, normal distribution, no outliers
b	Baseline	Sucrose preference (%)	94.3 ± 1.1 %	F = 17.38, R squared = 0.7129	8	Repeated measures one-way ANOVA with Geisser-Greenhouse correction of sphericity and post hoc t-tests using Dunnett correction, no outliers
	CDM		66.5 ± 2.5 %	CDM vs. Bsl: p < 0.0001	8
	Vector Post 1		78.1 ± 4.0 %	CDM vs. POST1: p = 0.1097	8
	Vector Post 2		76.4 ± 3.5 %	CDM vs. POST1: p = 0.2105	8
	Baseline	Sucrose preference (%)	90.6 ± 0.8 %	F = 29.68, R squared = 0.8318	7	Repeated measures one-way ANOVA with Geisser-Greenhouse correction of sphericity and post hoc t-tests using Dunnett correction, no outliers
	CDM		70.4 ± 3.4 %	CDM vs. Bsl: p = 0.0011	7
	NAB Post 1		88.7 ± 3.4 %	CDM vs. POST1: p = 0.0002	7
	NAB Post 2		88.5 ± 2.7 %	CDM vs. POST1: p < 0.0001	7
	Baseline	Sucrose preference (%)	92.8 ± 1.1 %	F = 28.04, R squared = 0.8752	5	Repeated measures one-way ANOVA with Geisser-Greenhouse correction of sphericity and post hoc t-tests using Dunnett correction, no outliers
	CDM		69.6 ± 3.7 %	CDM vs. Bsl: p = 0.0060	5
	KET Post 1		91.8 ± 2.9 %	CDM vs. POST1: p = 0.0167	5
	KET Post 2		87.8 ± 1.7 %	CDM vs. POST1: p = 0.0078	5
	Baseline	Sucrose preference (%)	93.6 ± 1.6 %	F = 7.82, R squared = 0.6617	5	Repeated measures one-way ANOVA with Geisser-Greenhouse correction of sphericity and post hoc t-tests using Dunnett correction, no outliers
	CDM		74.4 ± 2.4 %	CDM vs. Bsl: p = 0.0008	5
	sc.siRNA Post 1		80.9 ± 5.7 %	CDM vs. POST1: p = 0.5029	5
	sc.siRNA Post 2		80.8 ± 5.9 %	CDM vs. POST1: p = 0.5187	5
	Baseline	Sucrose preference (%)	96.6 ± 0.8 %	F = 11.88, R squared = 0.6644	7	Repeated measures one-way ANOVA with Geisser-Greenhouse correction of sphericity and post hoc t-tests using Dunnett correction, no outliers
	CDM		72.4 ± 3.8 %	CDM vs. Bsl: p = 0.0035	7
	GRIN2D-siRNA Post 1		78.7 ± 3.2 %	CDM vs. POST1: p = 0.5934	7
	GRIN2D-siRNA Post 2		88.0 ± 3.1 %	CDM vs. POST1: p = 0.0490	7
Figure 7
a	Baseline - Saline	Time spend with object 2/object 1	0.8678 ± 0.1025		7
	Baseline - NAB-14		0.9894 ± 0.1892		9
	Baseline - KET		0.8959 ± 0.1974		8
	OLT- Saline		2.503 ± 0.5458		7
	OLT - NAB-14		2.483 ± 0.3938		9
	OLT - KET		3.158 ± 0.9512		8
	Trial x treatment			F = 0.2191, p = 0.8051		Two-way ANOVA (treatment x time) with Tukey`s multiple comparision test
	Trial			F = 19.23, p = 0.0003
	Treatment			F = 0.3403, p = 0.7154
	Baseline vs. OLT (saline)			adjusted p = 0.0443		Tukey's multiple comparision test
	Baseline vs. OLT (NAB-14)			adjusted p = 0.0334		Tukey's multiple comparision test
	Baseline vs. OLT (KET)			adjusted p = 0.0038		Tukey's multiple comparision test
b (left)	Vehicle trial 1(5 min)	Latency to fall (s)	54 ± 5 s		6
	KET trial 1 (5 min)		5 ± 2 s		6
	NAB trial 1 (5 min)		58 ± 8 s		7
	Vehicle trial 2 (20 min)		62 ± 6 s		6
	KET trial 2 (20 min)		27 ± 5 s		6
	NAB trial 2 (20 min)		72 ± 13 s		7
	Vehicle trial 3 (35 min)		77 ± 7 s		6
	KET trial 3 (35 min)		36 ± 2 s		6
	NAB trial 3 (35 min)		86 ± 11 s		7
	Vehicle trial 4 (50 min)		88 ± 6 s		6
	KET trial 4 (50 min)		48 ± 3 s		6
	NAB trial 4 (50 min)		89 ± 14 s		7
	Trial x treatment			F = 0.9156, p = 0.492		Two-way ANOVA (treatment x time) with Tukey`s multiple comparision test
	Trial			F = 52.55, p < 0.0001
	Treatment			F = 10.08, p = 0.0015
	Vehicle vs KET			adjusted p = 0.0073		Tukey's multiple comparision test
	Vehicle vs NAB			adjusted p = 0.8571		Tukey's multiple comparision test
	KET vs NAB			adjusted p = 0.0018		Tukey's multiple comparision test
b (right)	Vehicle	Mean latency to fall (s)	70 ± 4 s	F = 26.71, R squared = 0.4226	6	One-way ANOVA with post-hoc t-tests, Dunnett correction
	KET		29 ± 4 s	Vehicle vs. KET: p < 0.0001	6
	NAB-14		76 ± 6 s	Vehicle vs. NAB: p < 0.0001	7
c	Control	distance travelled (m)	3.51 ± 0.55 m	F = 2.725, R squared 0.3008	8	One-way ANOVA with post-hoc t-tests, Dunnett correction
	NAB-14		3.08 ± 0.32 m	control vs. 10 NAB-14: p = 0.9090	9
	KET		4.27 ± 0.61 m	control vs. KET: p = 0.6857	7
	LOR		1.40 ± 0.37 m	control vs. Lorazepam: p = 0.021	7
d	Vector	Time spend in center (% of total time)	9.8 ± 1.0 %	F = 7.096, R squared 0.3921	9	One-way ANOVA with post-hoc t-tests, Dunnett correction
	NAB-14		11.6 ± 2.0 %	NAB-14 vs. vector: p = 0.6324	9
	KET		4.1 ± 0.6 %	KET vs. vector: p = 0.0273, KET vs. NAB-14: 0.0038	7
Figure S7
a	Immobility time in absolute values	Day1	223 ± 23 s		9
		Day 2	279 ± 23 s		9
		Day 3	331 ± 32 s		9
		Day4	348 ± 28 s		9
		Day5	346 ± 37 s		9
		Test day	320 ± 32 s	Day 5 vs. Test day: p = 0.5902	9	Two-tailed paired t-test, normal distribution, no outliers
b	Immobility time in relative values	Day1	70 ± 10 %		9
		Day 2	84 ± 7 %		9
		Day 3	98 ± 9 %		9
		Day4	104 ± 7 %		9
		Day5	100.0 %		9
		Test day	98 ± 12 %	Day 5 vs. Test day, p = 0.8514	9	Two-tailed paired t-test, normal distribution, no outliers
